# Supplementary material for: Nephrologists’ perspectives on the impact of COVID-19 on caring for patients undergoing dialysis in Latin America: a qualitative study
Source: HighWire-hosted journal article supplement (doi:10.1136/bmjopen-2022-062321), 2023-05-01
Supplement: bmjopen-2022-062321supp002_data_supplement.pdf [file bmjopen-2022-062321supp002_data_supplement.pdf]

## **Supplementary File 2. Interview guide**

### **Introduction**

We are interested in the nephrologists' perspectives on the impact of COVID-19 on the care of patients receiving haemodialysis. We would like to know your opinion about whether you think there are differences in the care of patients on haemodialysis therapy infected by the SARS-CoV-2 virus. What are the first reactions to prepare for the Covid pandemic, the consequences of COVID-19 on the care of patients receiving dialysis, and the expectations and suggestions for post-Covid care?

### **Part 1: Initial reactions and preparation for Covid-19:**

1. When did you initially hear about COVID 19? What was your response to caring for patients on dialysis?
2. What were your main concerns – for patients, for yourself, for the staff?
3. What sorts of things did you have to do to prepare for the COVID-19 in terms of managing dialysis? What were the challenges, and how did you resolve these?

### **Part 2: Impact of COVID-19 on the care of the patient receiving dialysis**

4. What was the most significant impact of COVID-19 on the care of patients receiving dialysis – why? (Access to dialysis, health outcomes, quality of life etc.)
5. Were you able to address these – why, how?
6. What were the biggest challenges for you and the staff, the dialysis unit?
7. What were the most significant changes you have made, and how did you feel about these changes? Did you have patients receiving dialysis who had COVID-19 – what were the biggest challenges for the patient/for you?

### **Part 3: Expectations and Suggestions for Post-Covid care:**

8. What are/what do you expect maybe the challenges or changes patients will face as things improve?
9. What do you expect will happen after COVID-19 with the care of patients receiving dialysis? (Medium to long-term changes?)
10. Are there any changes you should implement or should continue through the post -COVID 19 - why?
11. What are the key learnings you have gained during this pandemic in terms of patient care? Could those apply now and in the future?

**Close**

Is there anything else you would like to add?

Thank you.
